# Supplementary material for: Tandem modification of amphiphilic cellulose ethers for amorphous solid dispersion via olefin cross-metathesis and thiol-Michael addition
Source: Royal Society of Chemistry journal article supplement (doi:10.1039/c7py00228a), 2017-01-01
Supplement: c7py00228a1.pdf [file c7py00228a1.pdf]

### Electronic Supplementary Information (ESI)

We include herein product proton NMR spectra, HSQC spectra, and DSC curves not included in the manuscript body. All spectra were acquired using the instruments and methods described in the Experimental section.

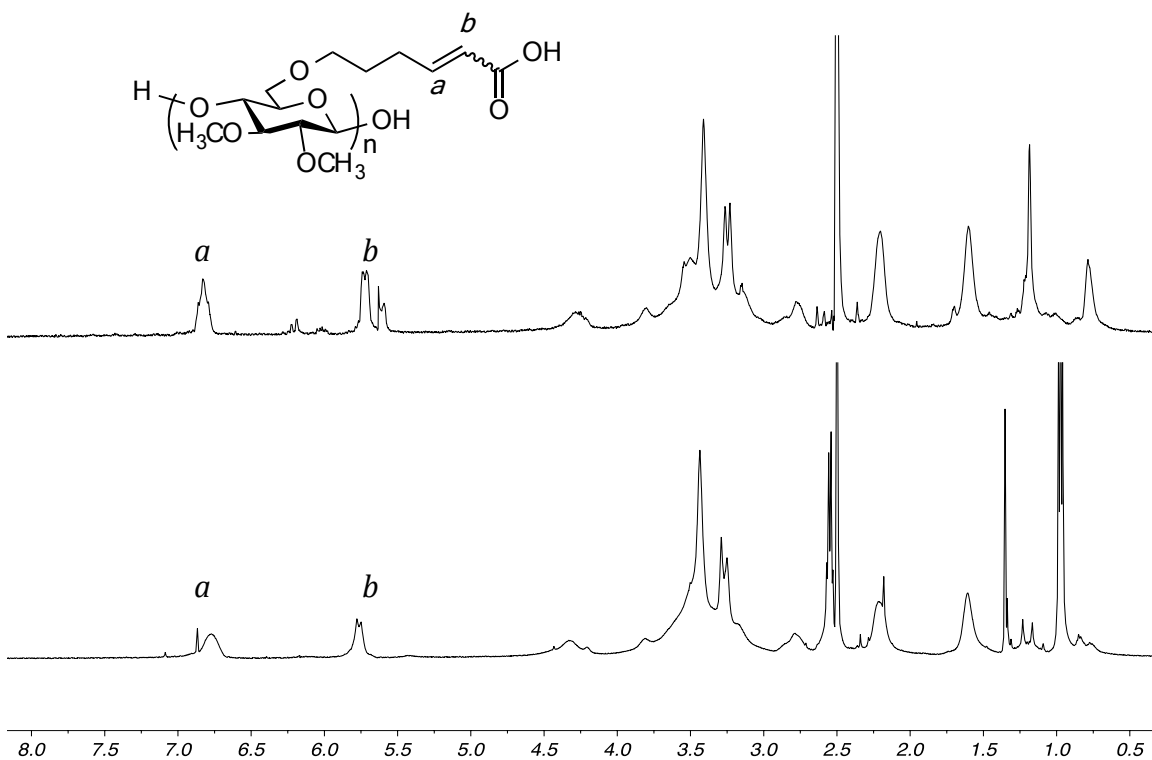

**Figure S1.** <sup>1</sup>H NMR spectra of MC1.82C5-AA and its thiol-Michael product with 2ME. (no sign of thiol addition)

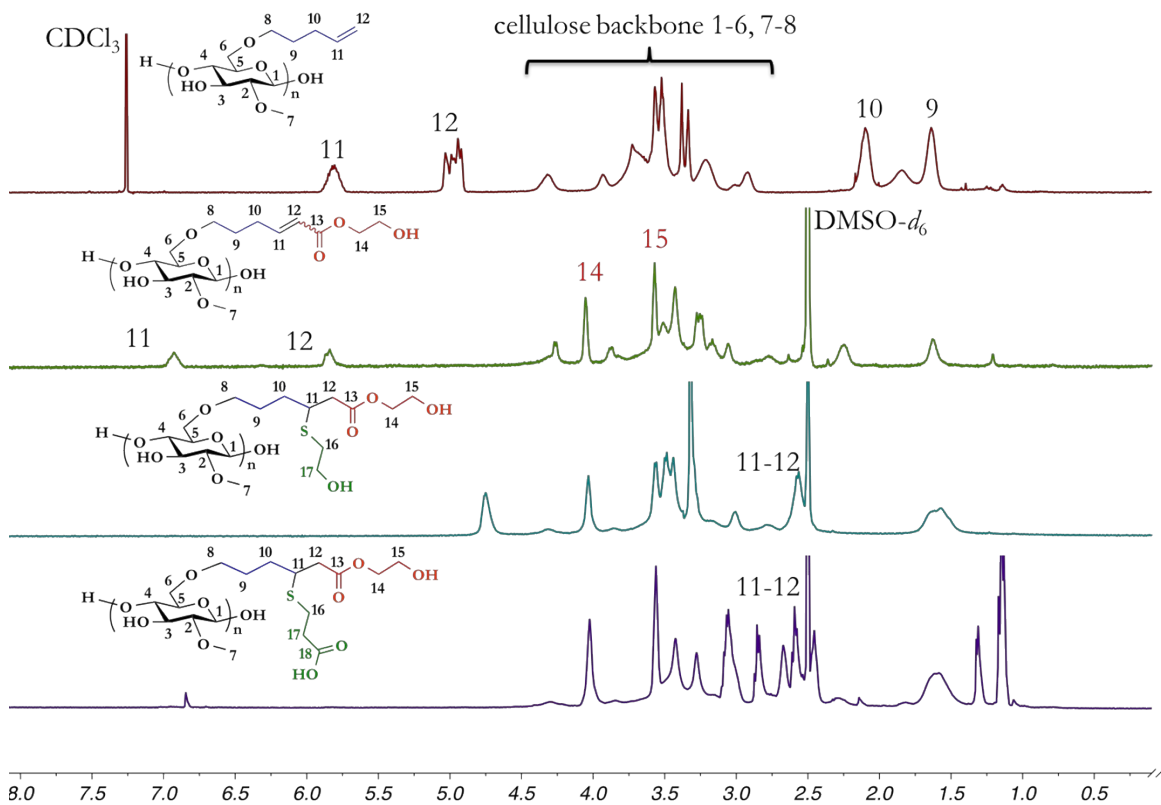

**Figure S2.**  $^1\text{H}$  NMR spectra of MC1.82C5, MC1.82C5-HEA, MC1.82C5-HEA-2ME and MC1.82C5-HEA-3MPA.

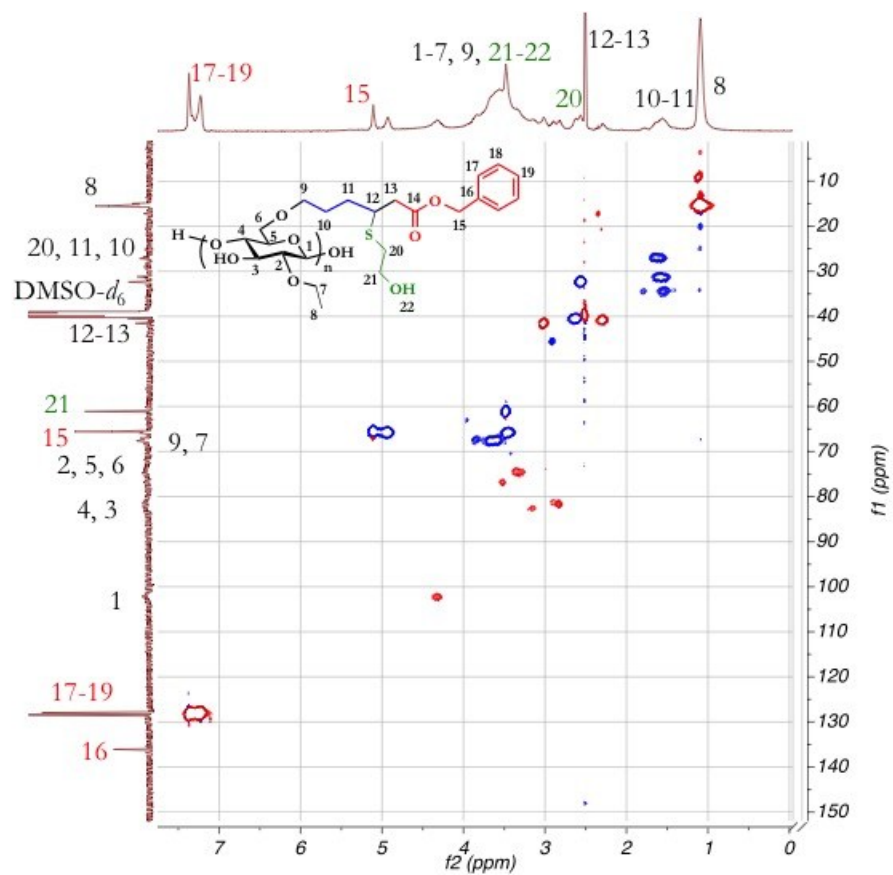

**Figure S3.** HSQC spectra of EC2.30C5-BA-2ME.

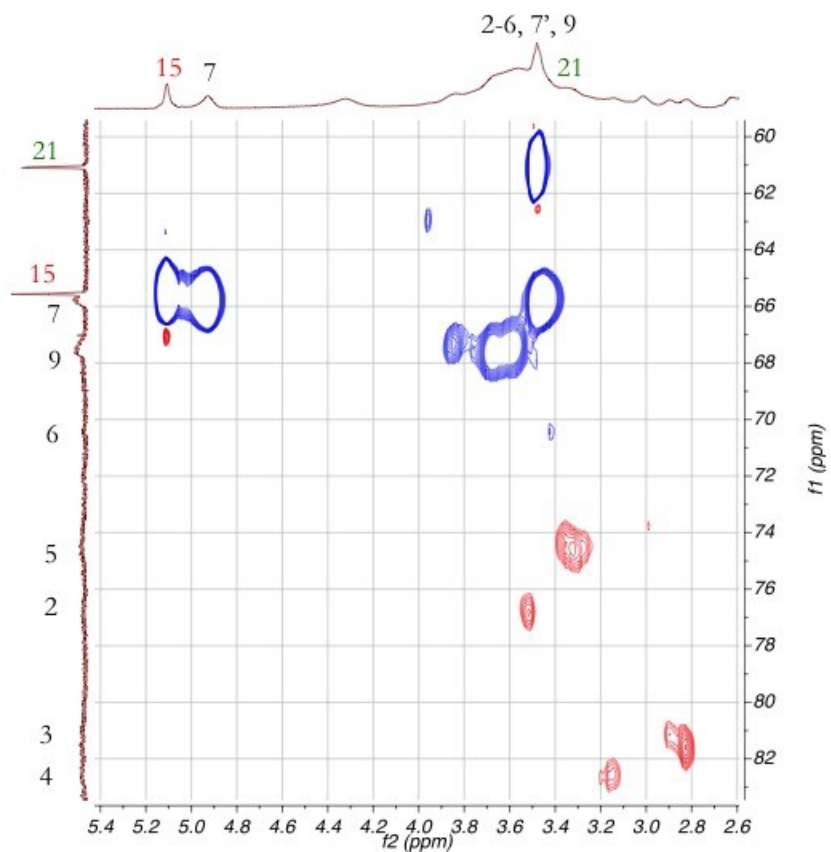

**Figure S4.** HSQC spectra of EC2.30C5-BA-2ME (backbone region).

MC-C5-HEA-2ME-0421

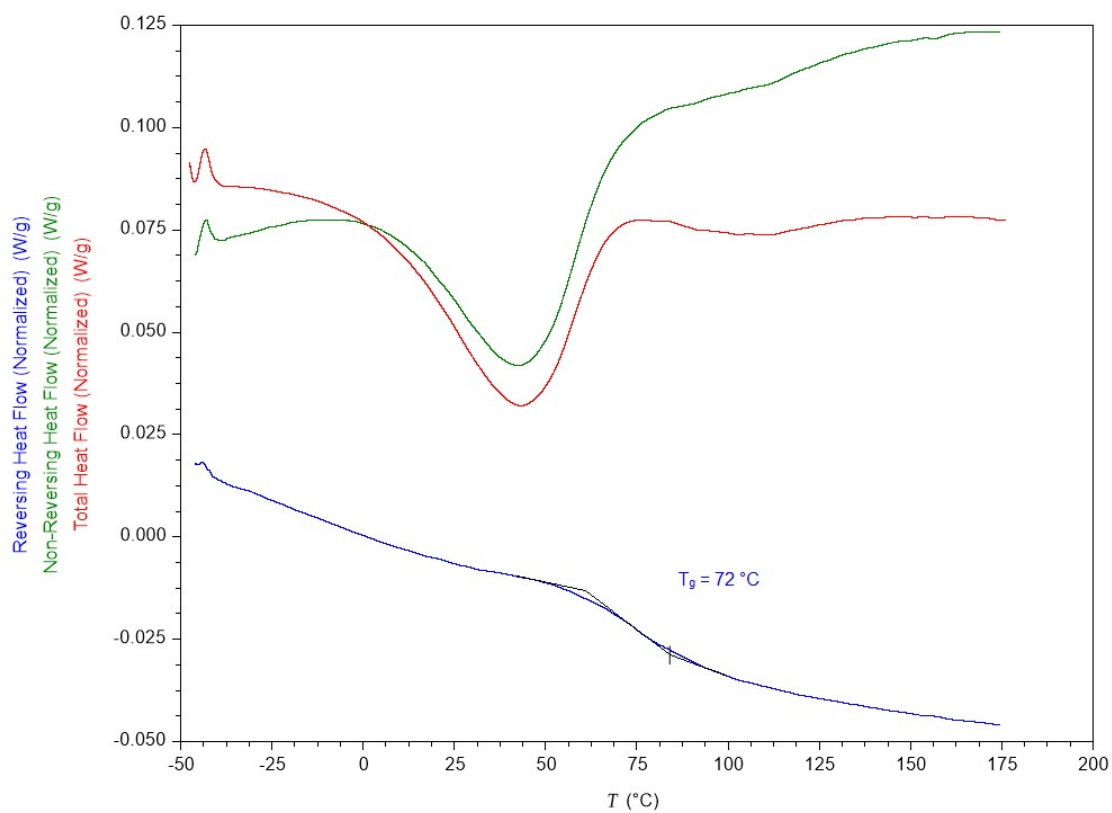

Figure S5. MDSC curve of MC1.82C5-HEA-2ME.

EC2.3C5-BA-2ME-0421

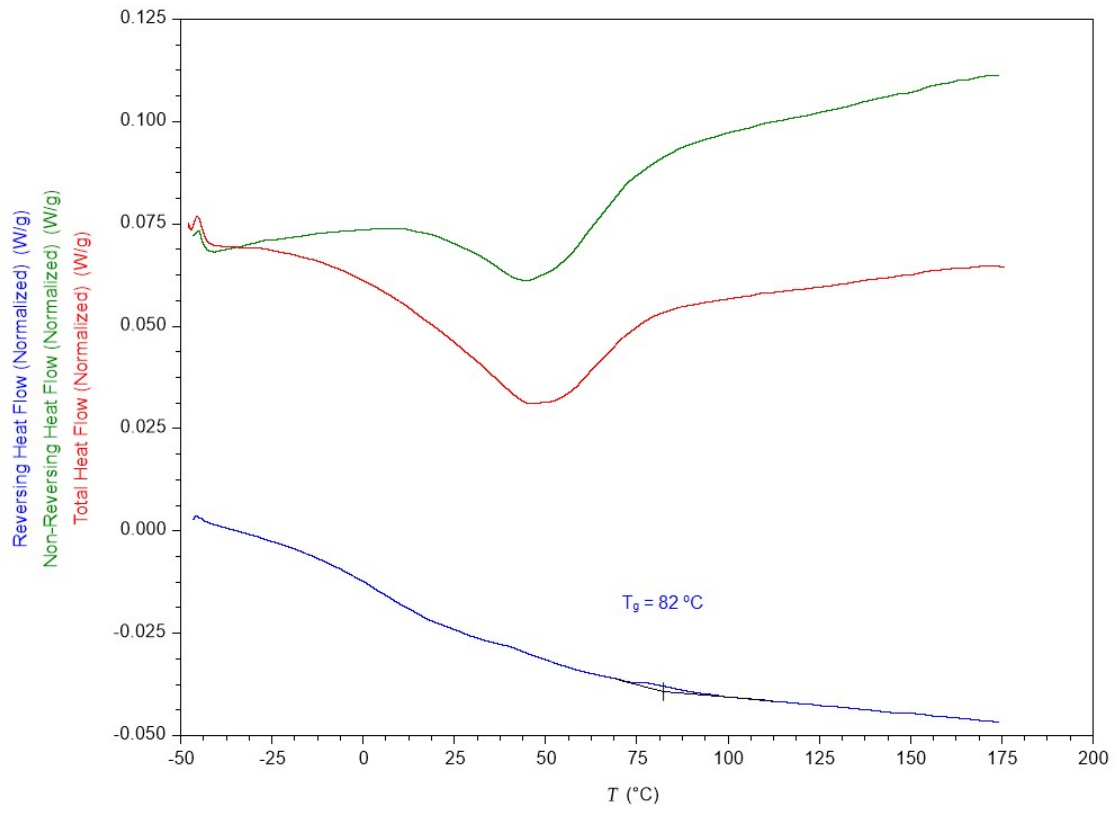

Figure S6. MDSC curve of EC2.30C5-BA-2ME.

EC2.3C5-BA-3MPA-0421

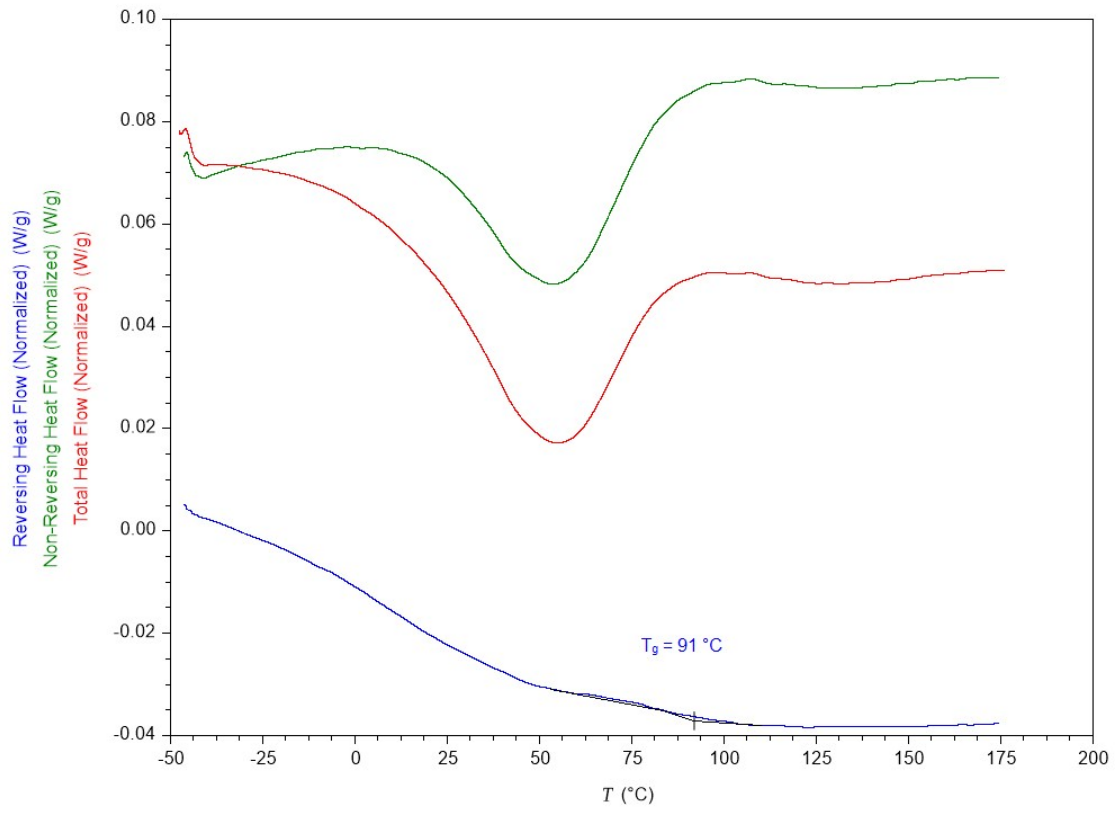

Figure S7. MDSC curve of EC2.30C5-BA-3MPA.

EC-C5-BA-2ME-TBAOH-0524

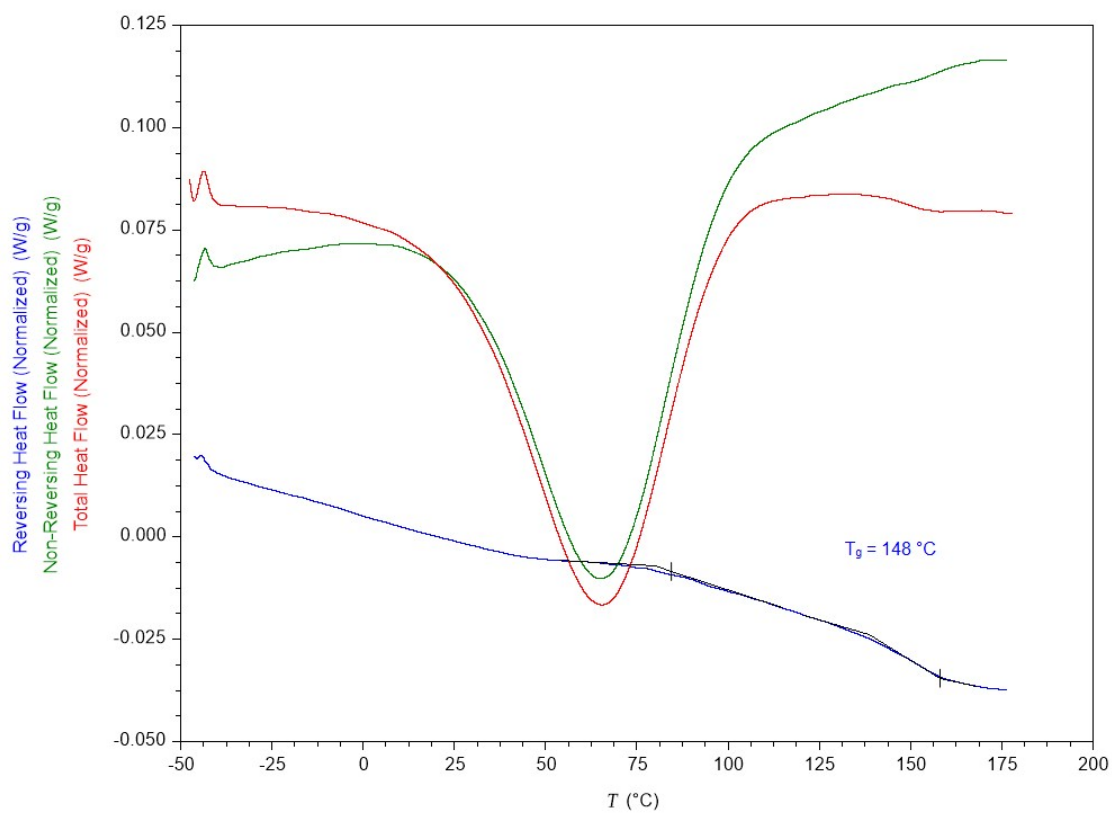

**Figure S8.** MDSC curve of EC2.30C5-BA-2ME-TBAOH.
